# Supplementary material for: Raltitrexed as a synergistic hyperthermia chemotherapy drug screened in patient-derived colorectal cancer organoids
Source: PubMed Central journal article supplement (PMC8330527; doi:10.20892/j.issn.2095-3941.2020.0566), 2021-08-15
Supplement: cbm-18-750-s001.pdf [file cbm-18-750-s001.pdf]

# Supplementary materials

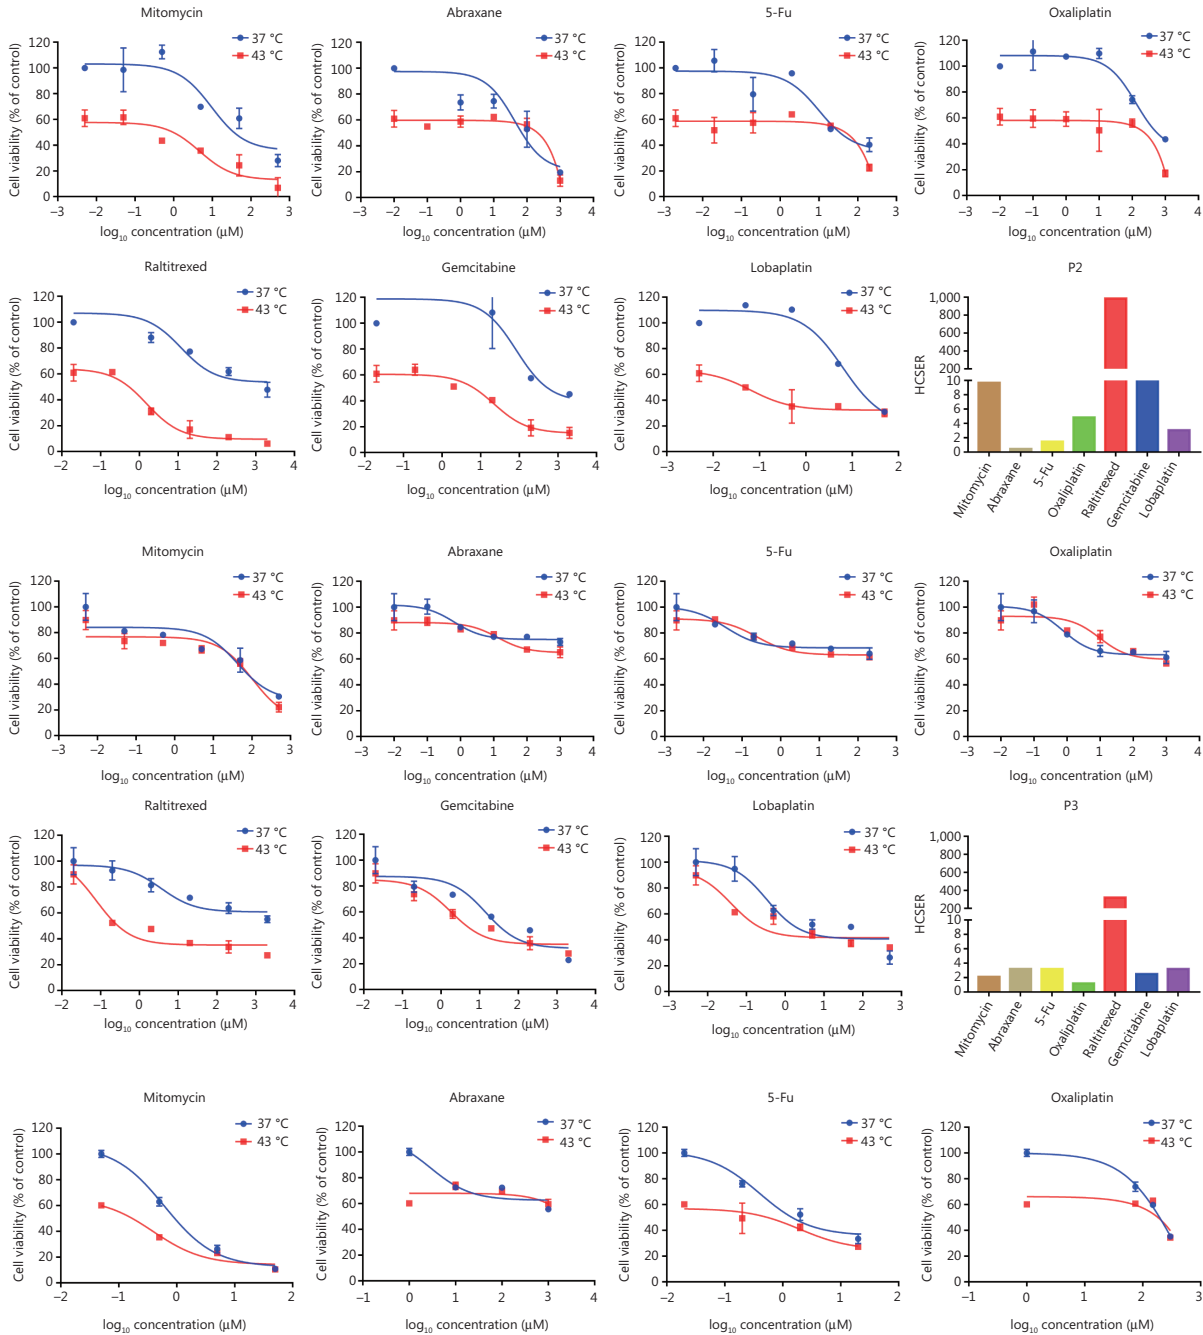

Figure S1 Continued

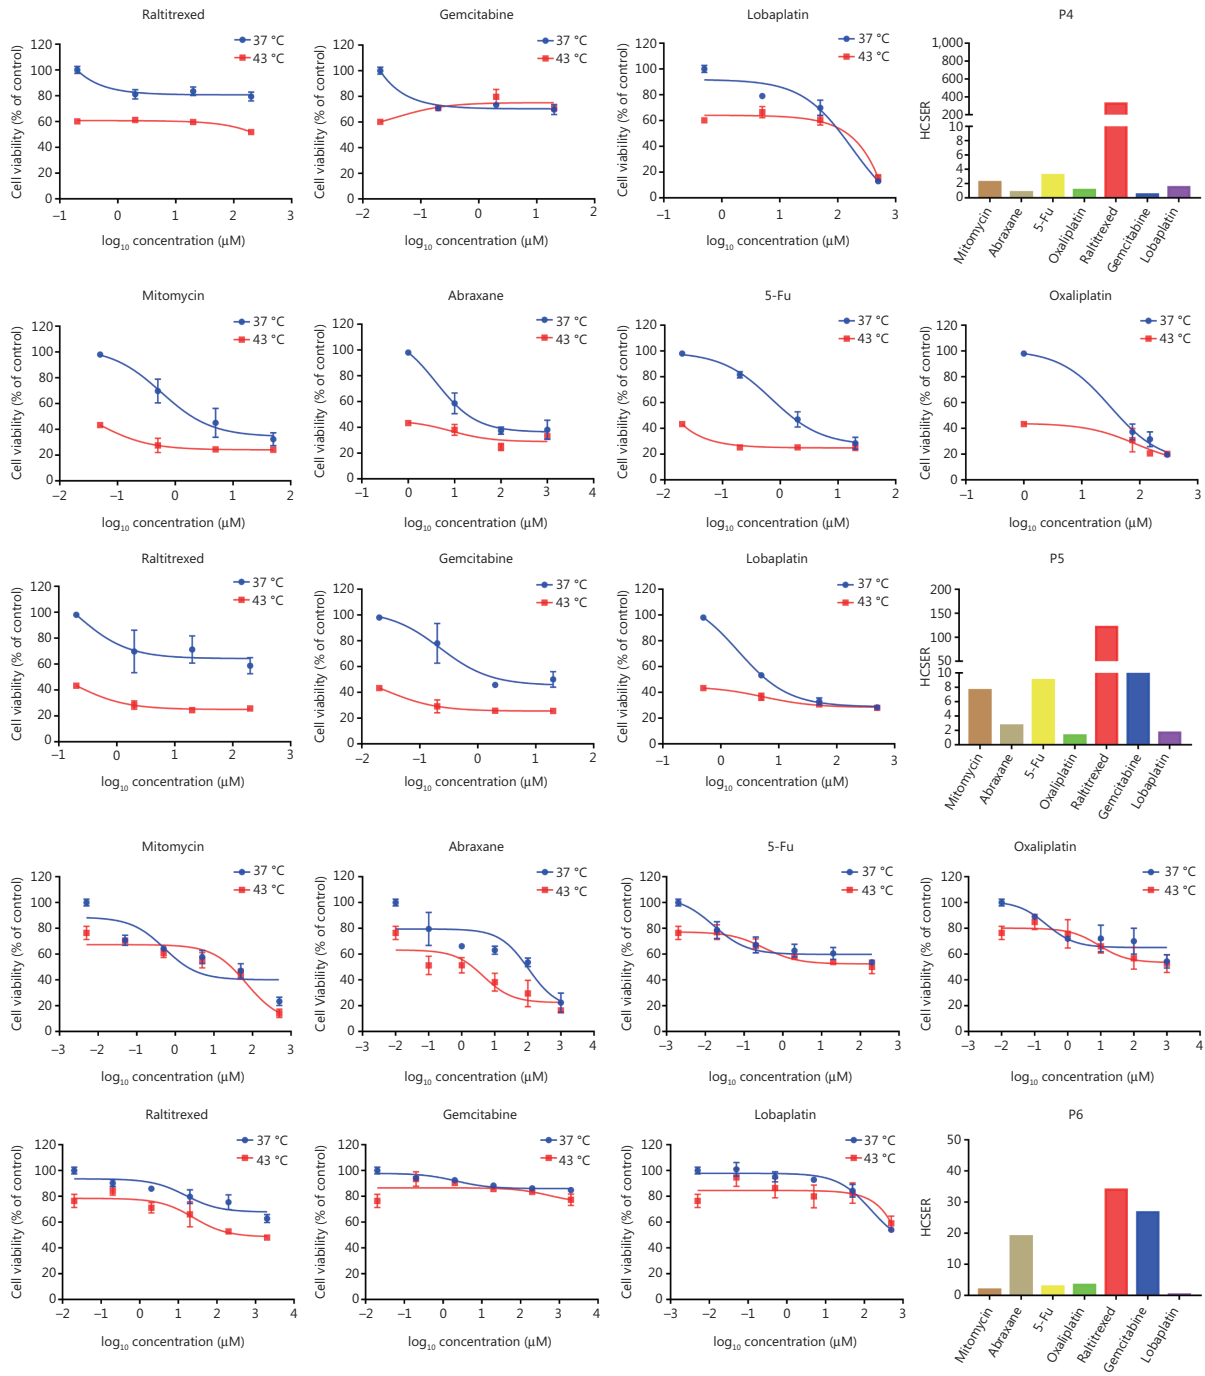

Figure S1 Continued

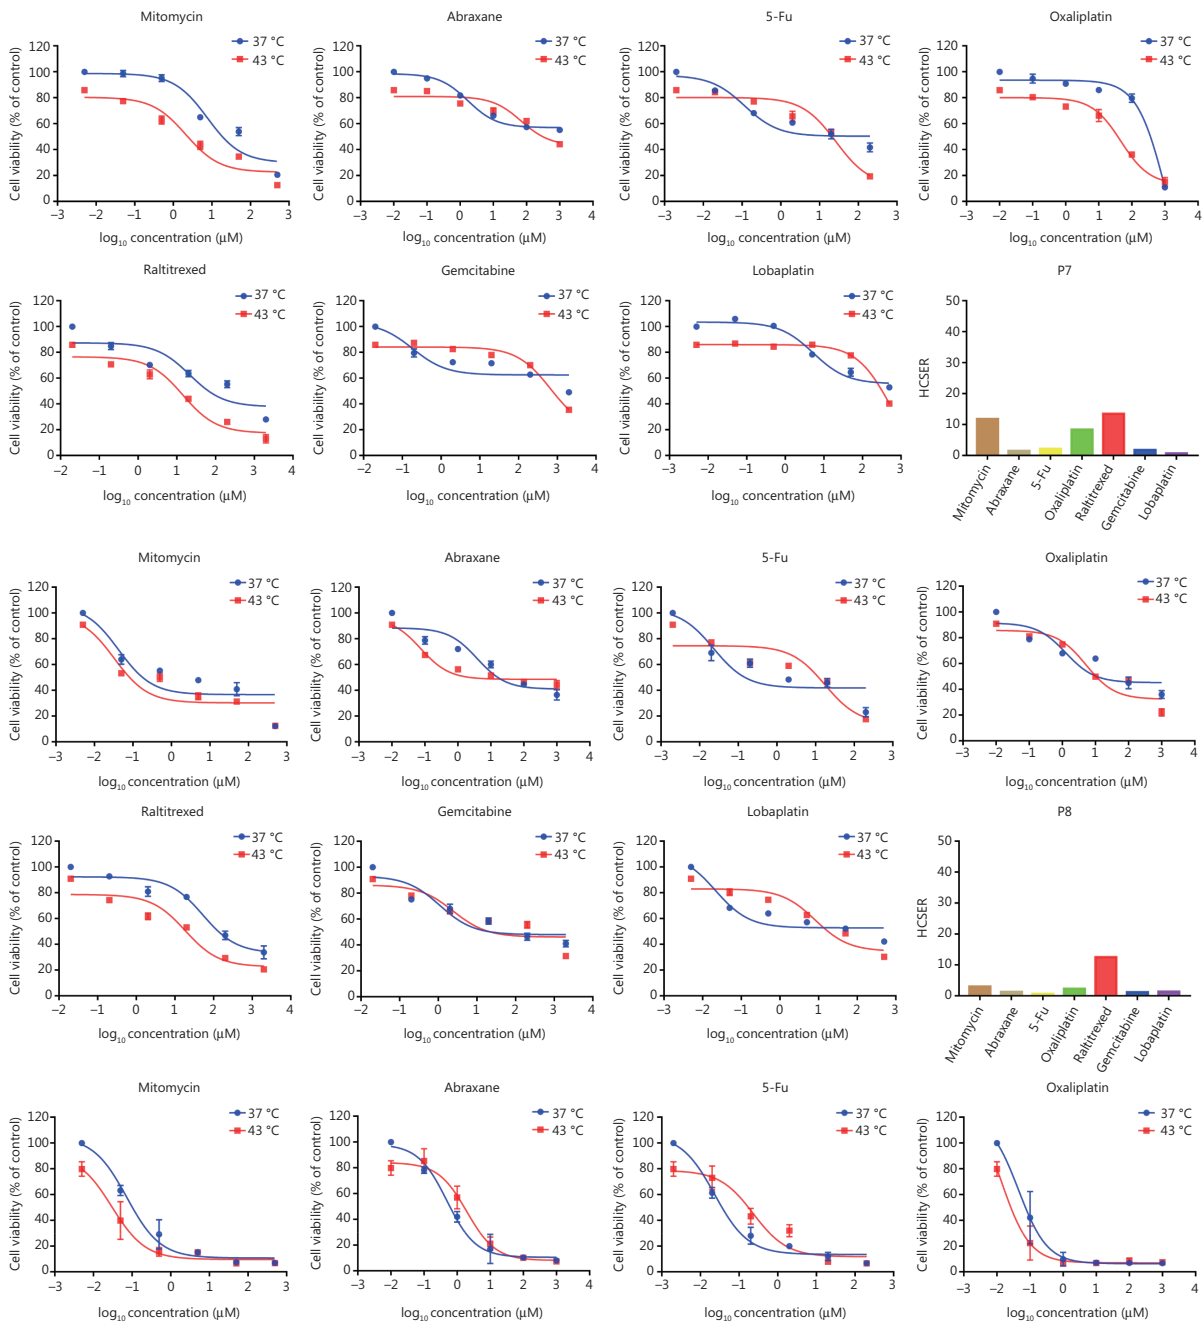

Figure S1 Continued

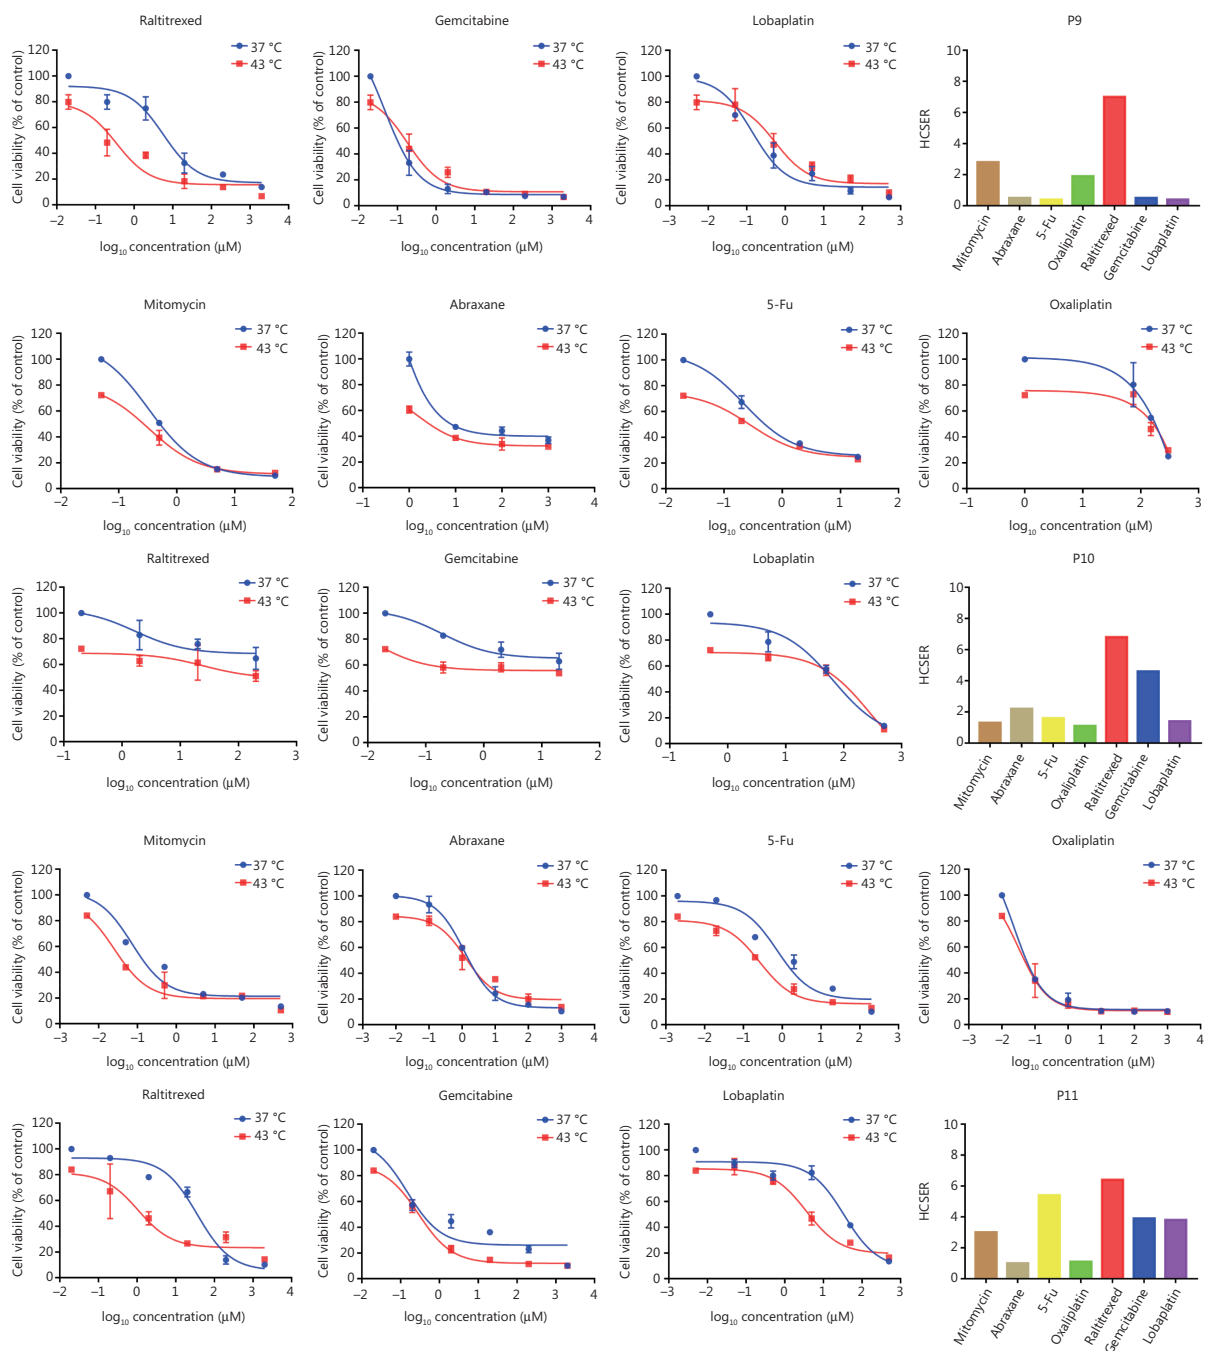

Figure S1 Continued

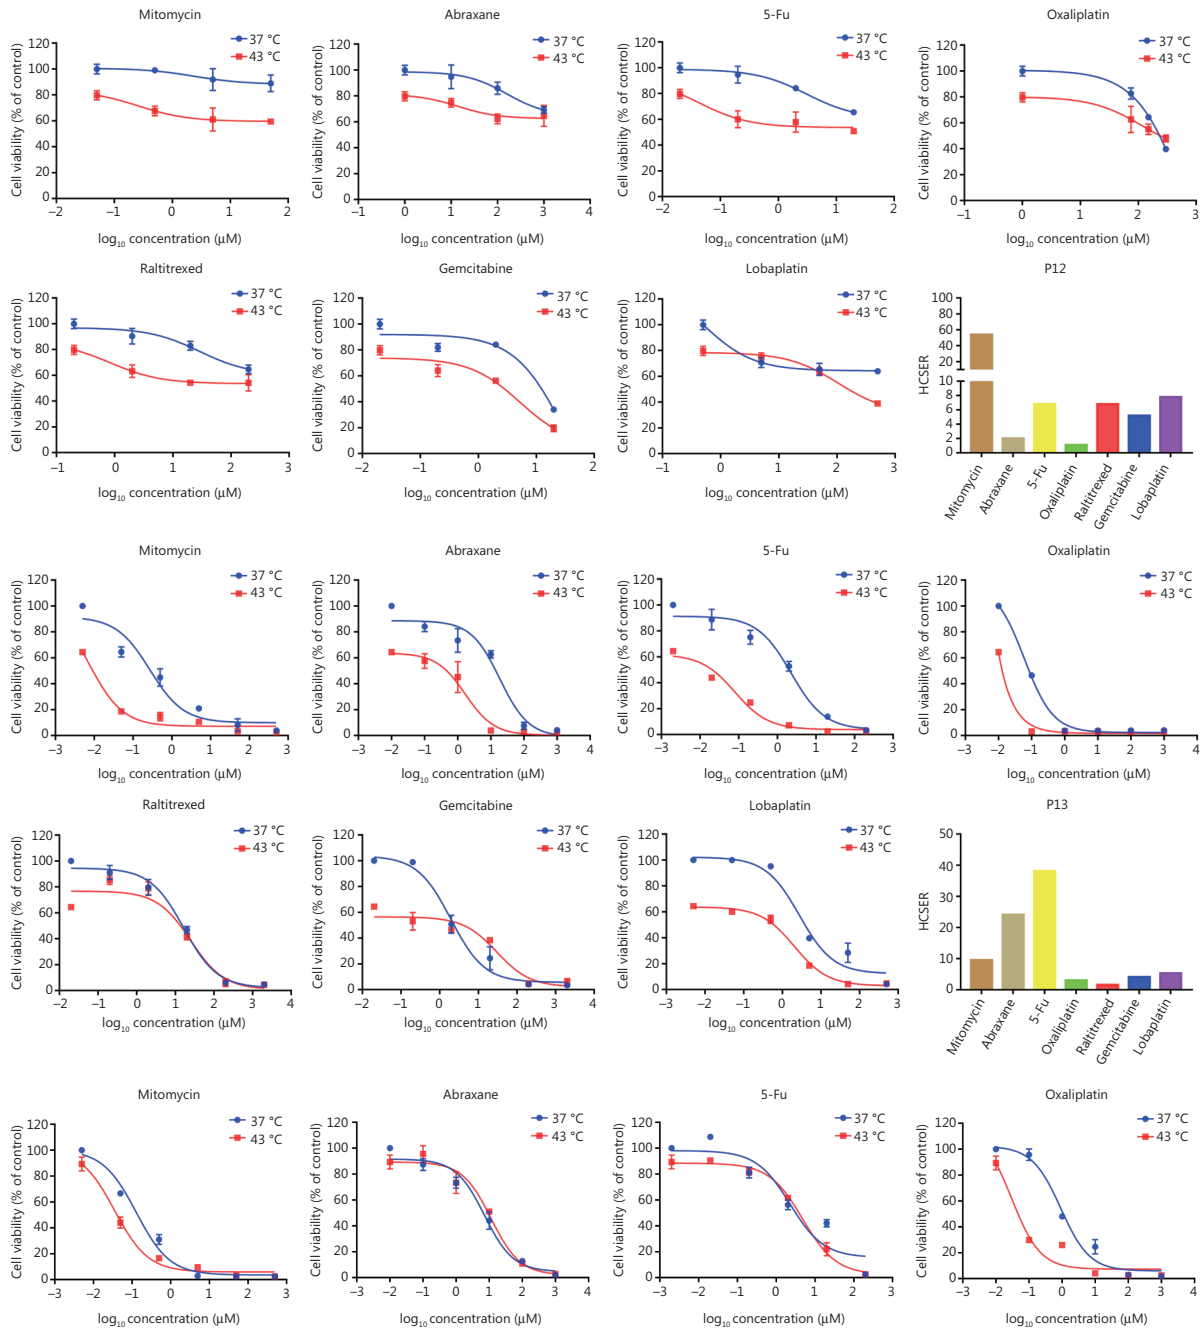

Figure S1 Continued

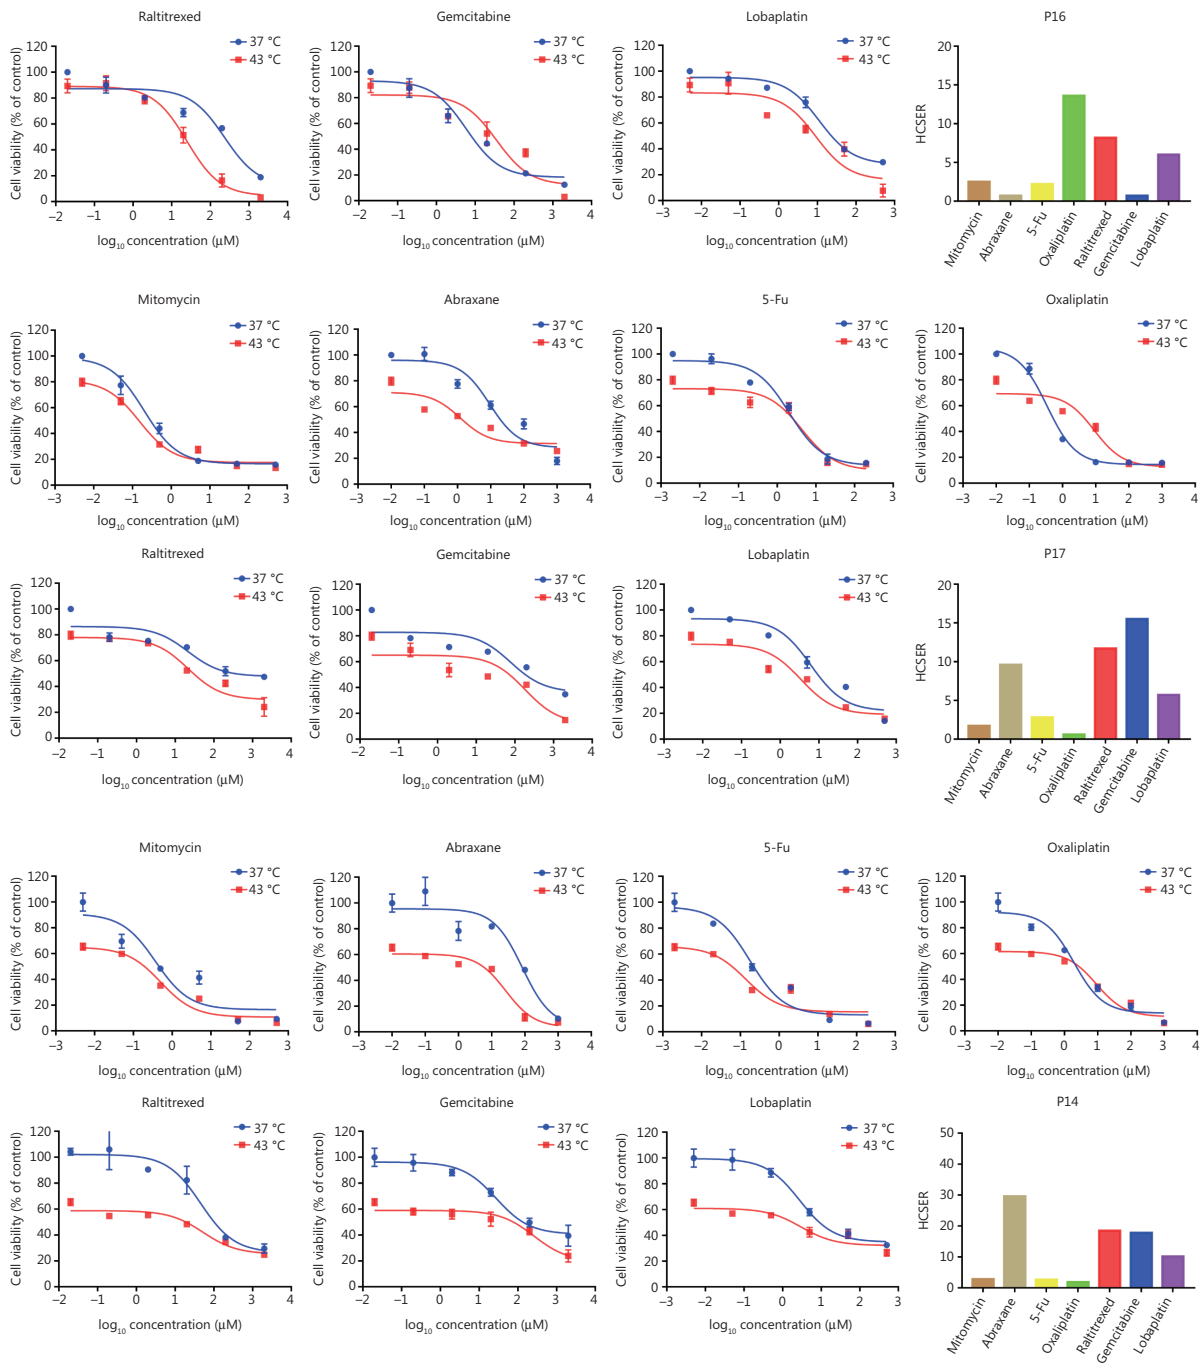

Figure S1 Continued

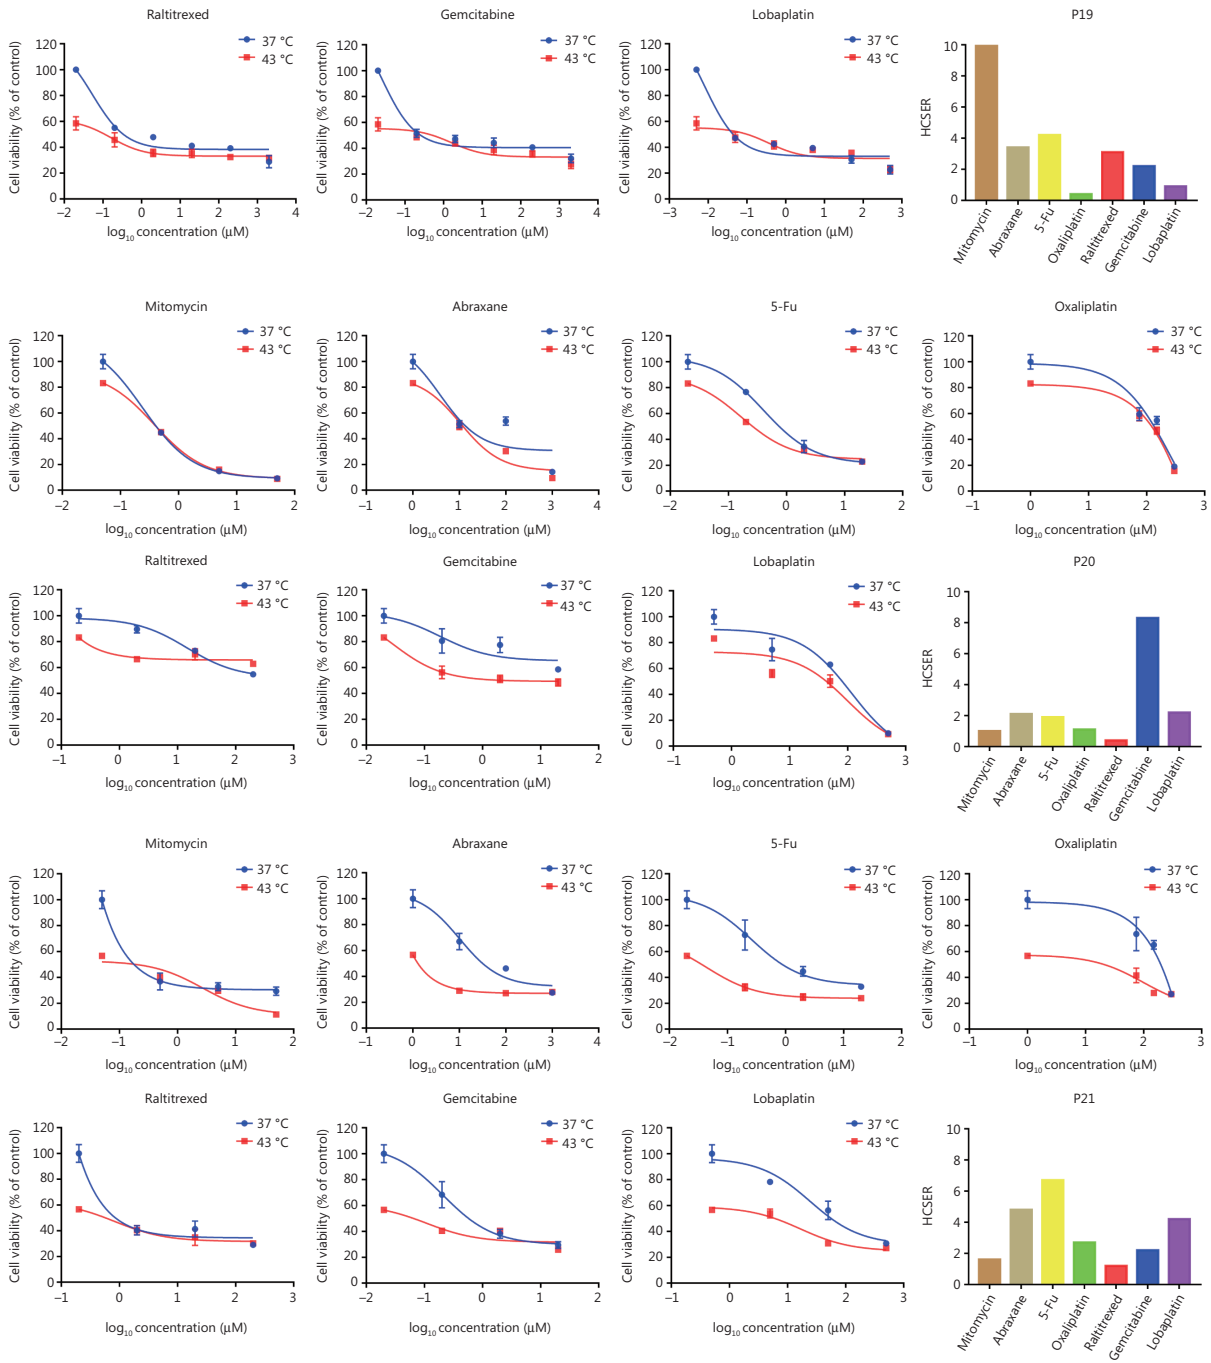

Figure S1 Continued

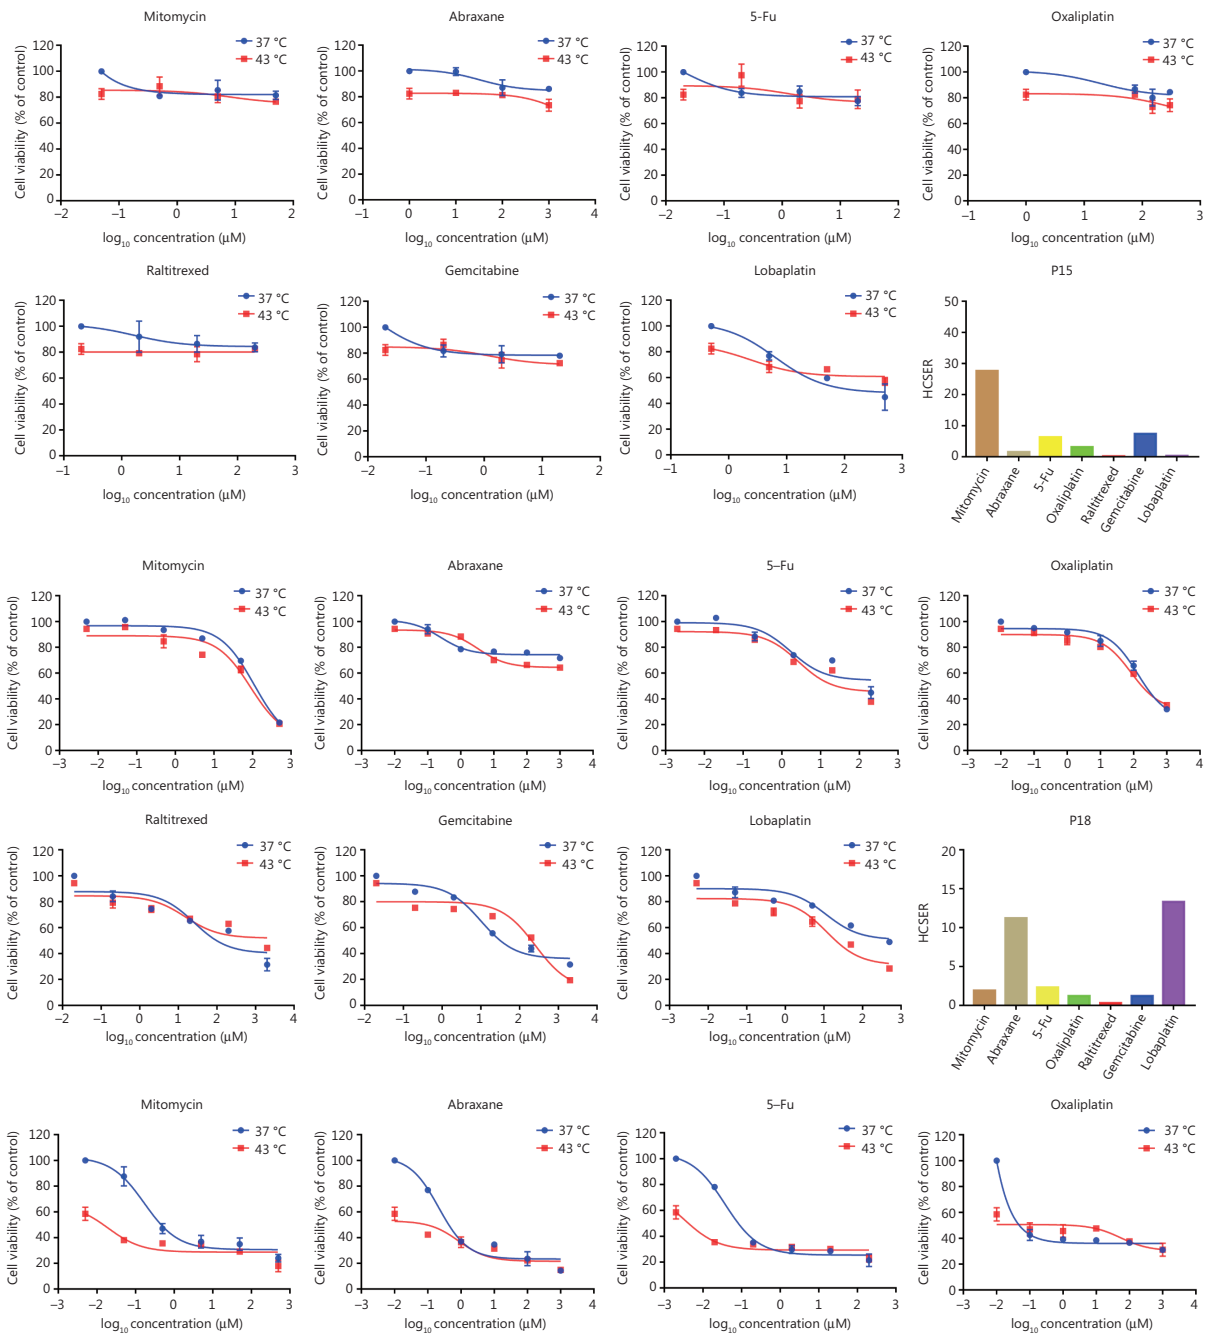

Figure S1 Continued



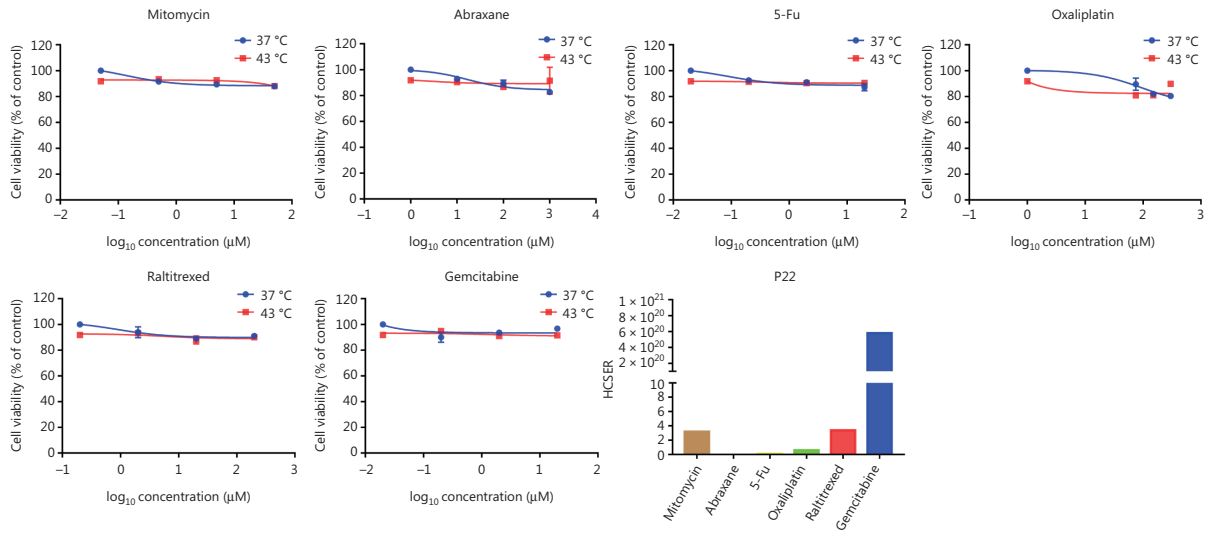

**Figure S1** Drug response curves and hyperthermia chemotherapy sensitization enhancement ratio scores of organoids derived from the remnant patients in the 22-patient cohort.

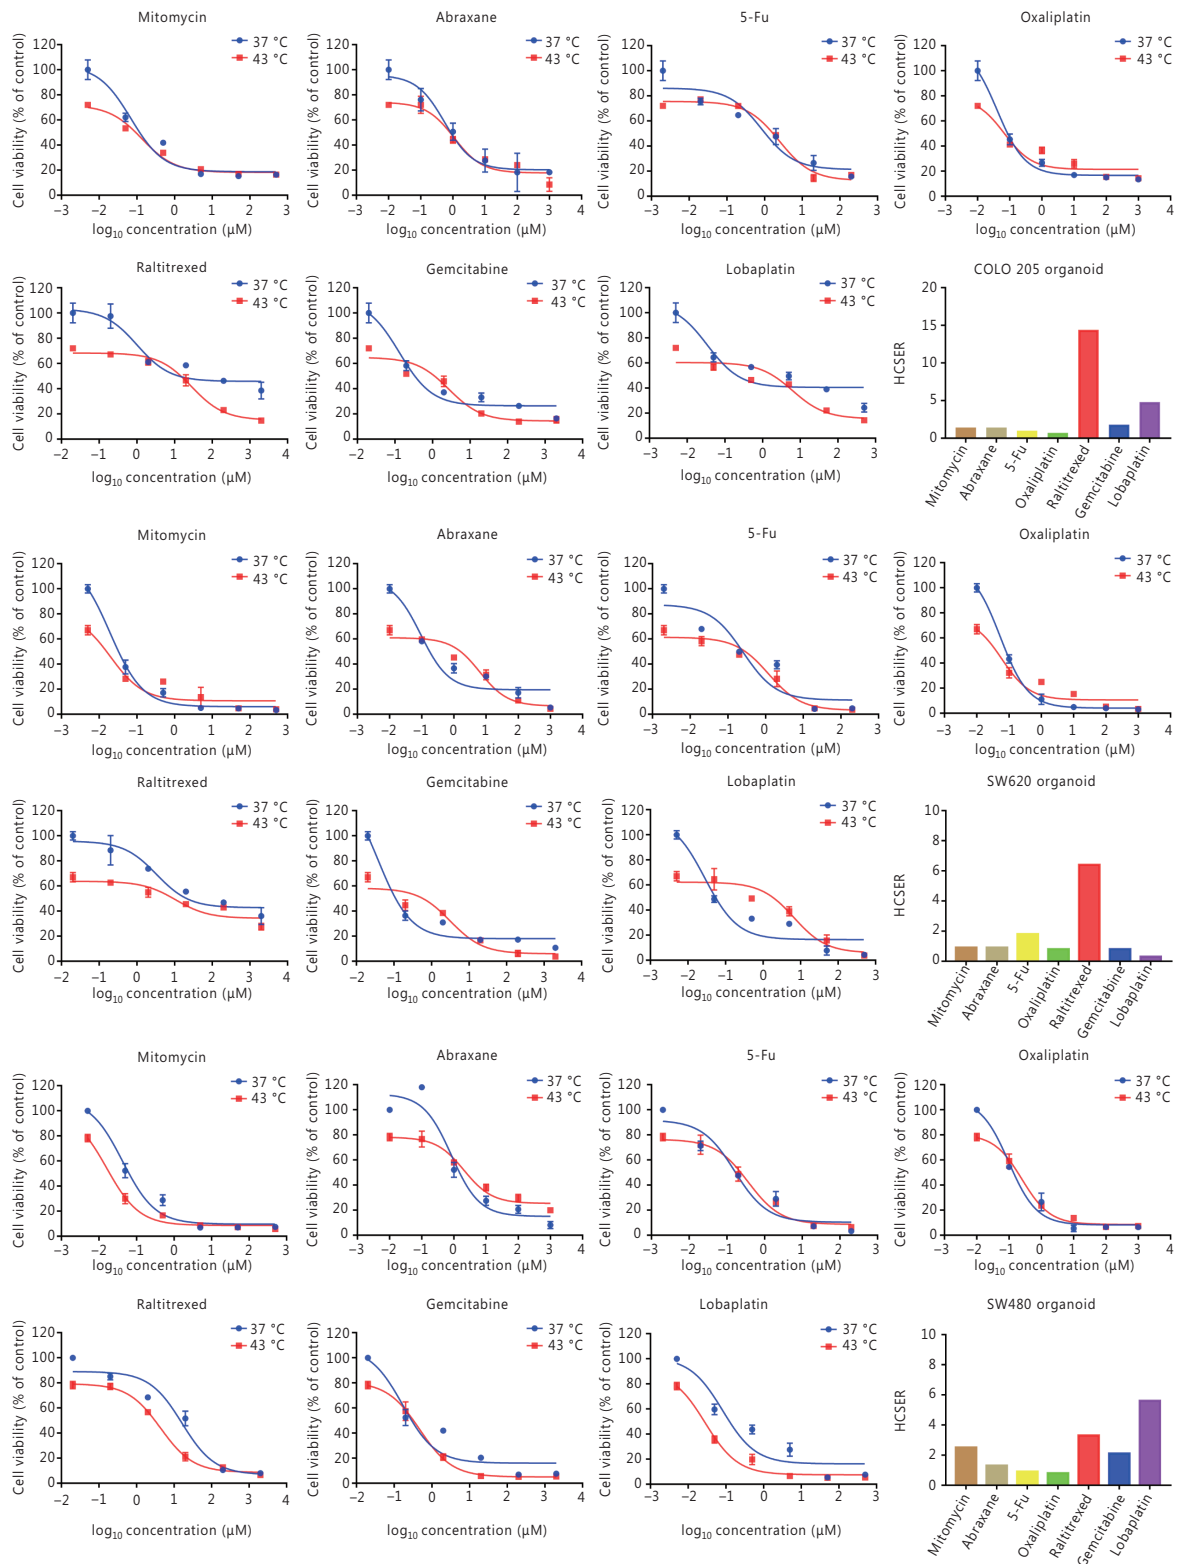

**Figure S2** Drug response curves and hyperthermia chemotherapy sensitization enhancement ratio scores of organoids derived from colorectal cancer cell lines.

**Table S1** Information on primary antibodies used in this study

| Target                    | Supplier                  | Cat. No. | Application | Dilution |
|---------------------------|---------------------------|----------|-------------|----------|
| GAPDH                     | Sigma-Aldrich             | G9545    | WB          | 1:2,000  |
| PI3K                      | ZEN BIO                   | 350172   | WB          | 1:1,000  |
| Phospho-PI3K (Tyr607)     | ZEN BIO                   | 340790   | WB          | 1:1,000  |
| AKT                       | Cell Signaling Technology | 4685     | WB          | 1:1,000  |
| Phospho-AKT (Thr308)      | Cell Signaling Technology | 13038    | WB          | 1:1,000  |
| 4E-BP1                    | Cell Signaling Technology | 9644     | WB          | 1:1,000  |
| Phospho-4E-BP1 (Thr37/46) | Cell Signaling Technology | 2855     | WB          | 1:1,000  |
| Focal Adhesion Kinase     | Affinity                  | AF6397   | WB          | 1:500    |
| Phospho-FAK (Tyr397)      | Affinity                  | AF3398   | WB          | 1:500    |

**Table S2** All IC<sub>50</sub> and standard deviation values of colorectal cancer patient samples and colorectal cancer cell lines

| Drug             | Average                  |                          |       | Standard deviation |        |        |
|------------------|--------------------------|--------------------------|-------|--------------------|--------|--------|
|                  | IC <sub>50</sub> (37 °C) | IC <sub>50</sub> (43 °C) | HCSER | 37 °C              | 43 °C  | HCSER  |
| <b>Patient 1</b> |                          |                          |       |                    |        |        |
| Mitomycin        | 21.76                    | 4.58                     | 4.8   | 12.04              | 0.17   | 3.52   |
| Abraxane         | 59.46                    | 34.55                    | 1.7   | 18.44              | 2.16   | 0.48   |
| 5-Fu             | 1.87                     | 0.48                     | 3.9   | 0.44               | 0.06   | 1.61   |
| Oxaliplatin      | 16.08                    | 4.28                     | 3.8   | 1.79               | 0.50   | 0.85   |
| Raltitrexed      | 19.14                    | 1.9                      | 10.1  | 4.40               | 0.26   | 4.56   |
| Gemcitabine      | 42.41                    | 32.03                    | 1.3   | 6.17               | 5.41   | 0.42   |
| Lobaplatin       | 0.77                     | 0.37                     | 2.1   | 0.10               | 0.03   | 0.63   |
| <b>Patient 2</b> |                          |                          |       |                    |        |        |
| Mitomycin        | 72.81                    | 0.75                     | 97.1  | 7.18               | 0.06   | 36.46  |
| Abraxane         | 64.86                    | 14.76                    | 4.4   | 21.75              | 0.01   | 2.41   |
| 5-Fu             | 63.46                    | 4.30                     | 14.8  | 8.61               | 2.72   | 6.87   |
| Oxaliplatin      | 621.64                   | 12.86                    | 48.3  | 100.78             | 6.46   | 20.96  |
| Raltitrexed      | 1,023.10                 | 1.04                     | 983.8 | 504.66             | 0.15   | 292.08 |
| Gemcitabine      | 770.32                   | 4.82                     | 159.8 | 180.69             | 0.25   | 1.47   |
| Lobaplatin       | 15.57                    | 0.51                     | 30.5  | 1.84               | 0.11   | 10.41  |
| <b>Patient 3</b> |                          |                          |       |                    |        |        |
| Mitomycin        | 56.37                    | 27.193                   | 2.1   | 24.12              | 8.71   | 1.94   |
| Abraxane         | 23,342.23                | 7,302.07                 | 3.2   | 253.59             | 636.87 | 0.85   |
| 5-Fu             | 1,117.47                 | 349.51                   | 3.2   | 497.33             | 101.96 | 0.31   |
| Oxaliplatin      | 1,470.59                 | 1,185.52                 | 1.2   | 480.41             | 227.88 | 1.21   |
| Raltitrexed      | 1,875.68                 | 5.865                    | 319.8 | 178.95             | 0.35   | 84.66  |
| Gemcitabine      | 58.72                    | 23.41                    | 2.5   | 41.90              | 6.57   | 1.24   |
| Lobaplatin       | 17.37                    | 5.361                    | 3.2   | 12.46              | 2.47   | 4.54   |
| <b>Patient 4</b> |                          |                          |       |                    |        |        |
| Mitomycin        | 1.58                     | 0.73                     | 2.2   | 0.20               | 0.01   | 0.47   |
| Abraxane         | 1,325.14                 | 1,682.37                 | 0.8   | 675.00             | 199.87 | 0.27   |
| 5-Fu             | 3.47                     | 1.09                     | 3.2   | 1.06               | 0.32   | 2.75   |
| Oxaliplatin      | 188.80                   | 171.4                    | 1.1   | 235.54             | 120.16 | 0.38   |
| Raltitrexed      | 32,187.80                | 98.87                    | 325.6 | 44,182.46          | 46.27  | 3.99   |
| Gemcitabine      | 213.17                   | 456.83                   | 0.5   | 96.21              | 49.73  | 0.21   |
| Lobaplatin       | 72.11                    | 47.04                    | 1.5   | 13.33              | 8.05   | 0.63   |
| <b>Patient 5</b> |                          |                          |       |                    |        |        |
| Mitomycin        | 6.36                     | 0.84                     | 7.6   | 1.48               | 0.42   | 2.79   |
| Abraxane         | 78.76                    | 29.71                    | 2.7   | 47.86              | 13.86  | 1.56   |

Table S2 Continued

| Drug        | Average                  |                          |        | Standard deviation |              |        |
|-------------|--------------------------|--------------------------|--------|--------------------|--------------|--------|
|             | IC <sub>50</sub> (37 °C) | IC <sub>50</sub> (43 °C) | HC SER | 37 °C              | 43 °C        | HC SER |
| 5-Fu        | 2.98                     | 0.33                     | 9.0    | 0.45               | 0.15         | 7.97   |
| Oxaliplatin | 62.69                    | 46.91                    | 1.3    | 0.45               | 24.91        | 0.97   |
| Raltitrexed | 433.52                   | 3.57                     | 121.5  | 1,335.49           | 0.21         | 39.59  |
| Gemcitabine | 7.10                     | 0.38                     | 18.8   | 19.81              | 0.11         | 13.84  |
| Lobaplatin  | 25.41                    | 14.52                    | 1.8    | 5.52               | 10.03        | 1.59   |
| Patient 6   |                          |                          |        |                    |              |        |
| Mitomycin   | 11.23                    | 5.87                     | 1.9    | 3.32               | 1.76         | 1.07   |
| Abraxane    | 40.12                    | 2.12                     | 19.0   | 30.66              | 0.84         | 4.70   |
| 5-Fu        | 116.61                   | 40.22                    | 2.9    | 56.28              | 26.06        | 1.17   |
| Oxaliplatin | 1,565.39                 | 463.15                   | 3.4    | 187.35             | 143.96       | 0.88   |
| Raltitrexed | 15,755.51                | 462.76                   | 34.0   | 8,008.95           | 137.89       | 6.27   |
| Gemcitabine | 1.51E+07                 | 5.60E+05                 | 27.0   | 3.38E+05           | 3.07E+03     | 3.76   |
| Lobaplatin  | 918.38                   | 3,041.62                 | 0.3    | 230.62             | 7,221,353.16 | 0.01   |
| Patient 7   |                          |                          |        |                    |              |        |
| Mitomycin   | 41.81                    | 3.55                     | 11.8   | 1.86               | 0.37         | 1.42   |
| Abraxane    | 518.38                   | 349.15                   | 1.5    | 59.90              | 87.15        | 0.20   |
| 5-Fu        | 22.4                     | 10.21                    | 2.2    | 8.33               | 1.84         | 1.30   |
| Oxaliplatin | 176.01                   | 20.89                    | 8.4    | 8.58               | 1.97         | 1.16   |
| Raltitrexed | 133.28                   | 9.84                     | 13.5   | 28.56              | 1.38         | 6.93   |
| Gemcitabine | 1,300.72                 | 741.27                   | 1.8    | 91.79              | 335.74       | 0.20   |
| Lobaplatin  | 302.39                   | 440.73                   | 0.7    | 35.13              | 211.57       | 0.04   |
| Patient 8   |                          |                          |        |                    |              |        |
| Mitomycin   | 2.85                     | 0.95                     | 3.0    | 0.91               | 0.08         | 1.24   |
| Abraxane    | 58.18                    | 43.55                    | 1.3    | 21.79              | 6.76         | 0.78   |
| 5-Fu        | 2.76                     | 3.77                     | 0.7    | 0.81               | 0.58         | 0.10   |
| Oxaliplatin | 59.87                    | 25.73                    | 2.3    | 16.18              | 3.01         | 0.53   |
| Raltitrexed | 235.60                   | 18.81                    | 12.5   | 39.32              | 2.17         | 4.30   |
| Gemcitabine | 138.04                   | 118.16                   | 1.2    | 47.63              | 9.24         | 0.31   |
| Lobaplatin  | 41.04                    | 29.02                    | 1.4    | 8.09               | 6.62         | 0.04   |
| Patient 9   |                          |                          |        |                    |              |        |
| Mitomycin   | 0.24                     | 0.09                     | 2.7    | 0.07               | 0.02         | 1.16   |
| Abraxane    | 1.08                     | 2.00                     | 0.5    | 0.39               | 0.47         | 0.21   |
| 5-Fu        | 0.10                     | 0.25                     | 0.4    | 0.03               | 0.04         | 0.26   |
| Oxaliplatin | 0.14                     | 0.07                     | 2.0    | 0.08               | 0.01         | 1.40   |

Table S2 Continued

| Drug        | Average                  |                          |        | Standard deviation |        |        |
|-------------|--------------------------|--------------------------|--------|--------------------|--------|--------|
|             | IC <sub>50</sub> (37 °C) | IC <sub>50</sub> (43 °C) | HC SER | 37 °C              | 43 °C  | HC SER |
| Raltitrexed | 11.73                    | 1.67                     | 7.0    | 2.76               | 0.36   | 3.86   |
| Gemcitabine | 0.25                     | 0.47                     | 0.5    | 0.06               | 0.10   | 0.24   |
| Lobaplatin  | 0.48                     | 1.10                     | 0.4    | 0.07               | 0.15   | 0.14   |
| Patient 10  |                          |                          |        |                    |        |        |
| Mitomycin   | 0.89                     | 0.70                     | 1.3    | 0.02               | 0.06   | 0.77   |
| Abraxane    | 79.02                    | 36.28                    | 2.2    | 10.77              | 3.92   | 1.75   |
| 5-Fu        | 1.29                     | 0.80                     | 1.6    | 0.20               | 0.05   | 0.77   |
| Oxaliplatin | 164.73                   | 147.79                   | 1.1    | 0.20               | 0.05   | 0.77   |
| Raltitrexed | 695.85                   | 102.43                   | 6.8    | 76.11              | 66.62  | 2.08   |
| Gemcitabine | 47.31                    | 10.36                    | 4.6    | 25.72              | 7.17   | 1.61   |
| Lobaplatin  | 53.49                    | 37.49                    | 1.4    | 7.21               | 1.84   | 0.38   |
| Patient 11  |                          |                          |        |                    |        |        |
| Mitomycin   | 0.61                     | 0.21                     | 2.9    | 0.05               | 0.02   | 1.67   |
| Abraxane    | 3.42                     | 3.32                     | 1.0    | 0.34               | 0.57   | 0.58   |
| 5-Fu        | 2.23                     | 0.42                     | 5.3    | 0.64               | 0.04   | 0.97   |
| Oxaliplatin | 0.16                     | 0.14                     | 1.1    | 0.02               | 0.03   | 0.89   |
| Raltitrexed | 27.49                    | 4.26                     | 6.5    | 0.38               | 2.44   | 1.12   |
| Gemcitabine | 2.87                     | 0.74                     | 3.9    | 0.34               | 0.08   | 0.48   |
| Lobaplatin  | 23.69                    | 6.23                     | 3.8    | 4.33               | 2.97   | 2.41   |
| Patient 12  |                          |                          |        |                    |        |        |
| Mitomycin   | 3,011.47                 | 56.00                    | 53.8   | 2,325.76           | 47.15  | 46.75  |
| Abraxane    | 4,142.60                 | 2,075.05                 | 2.0    | 2,273.25           | 689.07 | 1.56   |
| 5-Fu        | 56.47                    | 8.26                     | 6.8    | 14.14              | 16.97  | 2.88   |
| Oxaliplatin | 224.66                   | 204.31                   | 1.1    | 14.14              | 16.97  | 2.88   |
| Raltitrexed | 648.13                   | 95.23                    | 6.8    | 55.59              | 32.06  | 4.13   |
| Gemcitabine | 9.47                     | 1.80                     | 5.3    | 1.54               | 0.45   | 2.97   |
| Lobaplatin  | 1,189.60                 | 153.20                   | 7.8    | 729.39             | 91.76  | 2.68   |
| Patient 13  |                          |                          |        |                    |        |        |
| Mitomycin   | 0.39                     | 0.04                     | 9.51   | 0.05               | 0.01   | 6.93   |
| Abraxane    | 6.76                     | 0.28                     | 24.14  | 1.84               | 0.07   | 7.00   |
| 5-Fu        | 1.41                     | 0.04                     | 38.11  | 0.08               | 0.05   | 8.27   |
| Oxaliplatin | 0.12                     | 0.04                     | 2.93   | 0.003              | 0.01   | 0.38   |
| Raltitrexed | 12.26                    | 7.61                     | 1.61   | 1.18               | 1.48   | 0.91   |
| Gemcitabine | 3.42                     | 0.83                     | 4.12   | 1.33               | 0.13   | 1.87   |
| Lobaplatin  | 4.91                     | 0.94                     | 5.22   | 0.97               | 0.003  | 2.57   |

Table S2 Continued

| Drug        | Average                  |                          |        | Standard deviation |          |        |
|-------------|--------------------------|--------------------------|--------|--------------------|----------|--------|
|             | IC <sub>50</sub> (37 °C) | IC <sub>50</sub> (43 °C) | HC SER | 37 °C              | 43 °C    | HC SER |
| Patient 14  |                          |                          |        |                    |          |        |
| Mitomycin   | 0.87                     | 0.31                     | 2.8    | 0.34               | 0.27     | 2.40   |
| Abraxane    | 54.14                    | 1.83                     | 29.6   | 31.59              | 0.29     | 23.17  |
| 5-Fu        | 0.42                     | 0.16                     | 2.6    | 0.19               | 0.03     | 1.85   |
| Oxaliplatin | 3.27                     | 1.68                     | 1.9    | 1.56               | 0.25     | 0.75   |
| Raltitrexed | 157.21                   | 8.48                     | 18.5   | 23.55              | 0.62     | 13.68  |
| Gemcitabine | 344.73                   | 19.35                    | 17.8   | 311.73             | 11.21    | 12.55  |
| Lobaplatin  | 33.78                    | 3.31                     | 10.2   | 16.08              | 1.64     | 3.60   |
| Patient 15  |                          |                          |        |                    |          |        |
| Mitomycin   | 27,299.88                | 989.63                   | 27.6   | 6,545.77           | 512.34   | 23.35  |
| Abraxane    | 27,890.85                | 18,267.79                | 1.5    | 19,434.59          | 9,312.66 | 0.01   |
| 5-Fu        | 1,207.98                 | 191.96                   | 6.3    | 528.39             | 319.43   | 2.26   |
| Oxaliplatin | 3,122.11                 | 1,022.56                 | 3.1    | 438.90             | 432.43   | 1.35   |
| Raltitrexed | 21,832.33                | 87,988.16                | 0.2    | 7,162.54           | 2,564.01 | 0.03   |
| Gemcitabine | 1,181.07                 | 159.28                   | 7.4    | 153.85             | 20.06    | 0.23   |
| Lobaplatin  | 189.05                   | 583.19                   | 0.3    | 147.73             | 209.89   | 0.05   |
| Patient 16  |                          |                          |        |                    |          |        |
| Mitomycin   | 0.21                     | 0.08                     | 2.6    | 0.07               | 0.02     | 0.20   |
| Abraxane    | 5.03                     | 6.9                      | 0.7    | 0.53               | 1.92     | 0.44   |
| 5-Fu        | 2.04                     | 0.92                     | 2.2    | 0.59               | 0.13     | 0.28   |
| Oxaliplatin | 1.7                      | 0.13                     | 13.1   | 0.37               | 0.02     | 6.30   |
| Raltitrexed | 136.54                   | 16.73                    | 8.2    | 28.18              | 6.37     | 4.46   |
| Gemcitabine | 13.91                    | 19.67                    | 0.7    | 5.54               | 6.16     | 0.37   |
| Lobaplatin  | 42.42                    | 7.08                     | 6.0    | 5.21               | 1.54     | 1.55   |
| Patient 17  |                          |                          |        |                    |          |        |
| Mitomycin   | 0.78                     | 0.45                     | 1.7    | 0.27               | 0.04     | 1.92   |
| Abraxane    | 39.75                    | 4.12                     | 9.6    | 3.25               | 0.52     | 2.89   |
| 5-Fu        | 3.22                     | 1.14                     | 2.8    | 0.61               | 0.19     | 0.96   |
| Oxaliplatin | 1.53                     | 2.54                     | 0.6    | 0.19               | 0.16     | 0.07   |
| Raltitrexed | 545.97                   | 46.59                    | 11.7   | 246.36             | 13.84    | 8.42   |
| Gemcitabine | 224.21                   | 14.45                    | 15.5   | 20.39              | 1.71     | 8.07   |
| Lobaplatin  | 14.03                    | 2.46                     | 5.7    | 2.09               | 0.12     | 2.32   |

Table S2 Continued

| Drug        | Average                  |                          |        | Standard deviation |          |        |
|-------------|--------------------------|--------------------------|--------|--------------------|----------|--------|
|             | IC <sub>50</sub> (37 °C) | IC <sub>50</sub> (43 °C) | HC SER | 37 °C              | 43 °C    | HC SER |
| Patient 18  |                          |                          |        |                    |          |        |
| Mitomycin   | 95.89                    | 51.03                    | 1.9    | 11.61              | 3.12     | 0.28   |
| Abraxane    | 33,496.08                | 3,001.73                 | 11.2   | 2,996.02           | 2,470.23 | 2.17   |
| 5-Fu        | 90.63                    | 39.56                    | 2.3    | 35.79              | 0.65     | 0.69   |
| Oxaliplatin | 281.39                   | 236.72                   | 1.2    | 4.38               | 3.82     | 0.00   |
| Raltitrexed | 202.86                   | 715.82                   | 0.3    | 72.55              | 263.21   | 0.15   |
| Gemcitabine | 109.27                   | 90.29                    | 1.2    | 16.28              | 5.20     | 0.11   |
| Lobaplatin  | 327.83                   | 24.65                    | 13.3   | 31.67              | 0.43     | 1.08   |
| Patient 19  |                          |                          |        |                    |          |        |
| Mitomycin   | 3.70                     | 0.37                     | 10.1   | 1.84               | 0.01     | 2.70   |
| Abraxane    | 2.22                     | 0.66                     | 3.4    | 0.45               | 0.04     | 3.28   |
| 5-Fu        | 0.52                     | 0.13                     | 4.1    | 0.04               | 0.002    | 2.12   |
| Oxaliplatin | 1.96                     | 4.48                     | 0.4    | 0.21               | 0.31     | 0.29   |
| Raltitrexed | 9.68                     | 3.10                     | 3.1    | 5.03               | 5.64     | 1.82   |
| Gemcitabine | 11.54                    | 5.16                     | 2.2    | 2.77               | 0.29     | 1.27   |
| Lobaplatin  | 0.88                     | 0.98                     | 0.9    | 0.40               | 0.05     | 0.40   |
| Patient 20  |                          |                          |        |                    |          |        |
| Mitomycin   | 0.75                     | 0.77                     | 1.0    | 0.27               | 0.72     | 0.20   |
| Abraxane    | 52.80                    | 24.64                    | 2.1    | 17.09              | 4.77     | 0.22   |
| 5-Fu        | 1.49                     | 0.80                     | 1.9    | 0.26               | 0.14     | 0.54   |
| Oxaliplatin | 123.61                   | 108.40                   | 1.1    | 0.26               | 0.14     | 0.54   |
| Raltitrexed | 220.62                   | 578.30                   | 0.4    | 64.53              | 0.26     | 0.04   |
| Gemcitabine | 40.02                    | 4.84                     | 8.3    | 23.02              | 1.64     | 4.09   |
| Lobaplatin  | 50.71                    | 23.47                    | 2.2    | 7.09               | 4.89     | 0.94   |
| Patient 21  |                          |                          |        |                    |          |        |
| Mitomycin   | 1.53                     | 0.96                     | 1.6    | 0.42               | 0.08     | 0.74   |
| Abraxane    | 94.99                    | 19.67                    | 4.8    | 21.31              | 0.46     | 2.12   |
| 5-Fu        | 2.52                     | 0.37                     | 6.8    | 1.37               | 0.06     | 3.04   |
| Oxaliplatin | 177.32                   | 66.74                    | 2.7    | 32.49              | 23.48    | 1.37   |
| Raltitrexed | 8.76                     | 7.46                     | 1.2    | 3.17               | 0.59     | 0.93   |
| Gemcitabine | 1.68                     | 0.77                     | 2.2    | 0.59               | 0.73     | 2.11   |
| Lobaplatin  | 91.08                    | 21.9                     | 4.2    | 49.99              | 3.14     | 1.49   |



Table S2 Continued

| Drug        | Average                  |                          |          | Standard deviation |             |          |
|-------------|--------------------------|--------------------------|----------|--------------------|-------------|----------|
|             | IC <sub>50</sub> (37 °C) | IC <sub>50</sub> (43 °C) | HC SER   | 37 °C              | 43 °C       | HC SER   |
| Patient 22  |                          |                          |          |                    |             |          |
| Mitomycin   | 55,054.80                | 33,432.07                | 1.6      | 3,598.61           | 998.24      | 0.68     |
| Abraxane    | 68,460.42                | 35,045,104               | 0.002    | 29,604.49          | 336,675.47  | 0.001    |
| 5-Fu        | 11,383.49                | 252,890.2                | 0.05     | 6,887.40           | 81,579.59   | 0.03     |
| Oxaliplatin | 2,351.46                 | 9,320.58                 | 0.3      | 1,887.40           | 8.16        | 0.05     |
| Raltitrexed | 647,384.3                | 377,677.7                | 1.7      | 19,458.87          | 20,062.92   | 1.25     |
| Gemcitabine | 3.47E+22                 | 66,969.59                | 5.18E+22 | 1.02E+18           | 58,474.2835 | 3.28E+17 |
| Lobaplatin  | /                        | /                        | /        | /                  | /           | /        |
| DLD-1       |                          |                          |          |                    |             |          |
| Mitomycin   | 0.21                     | 0.10                     | 2.0      | 0.07               | 0.01        | 1.73     |
| Abraxane    | 1.26                     | 0.90                     | 1.4      | 0.22               | 0.02        | 0.85     |
| 5-Fu        | 0.54                     | 0.38                     | 1.4      | 0.08               | 0.05        | 0.73     |
| Oxaliplatin | 0.24                     | 0.28                     | 0.9      | 0.06               | 0.04        | 0.45     |
| Raltitrexed | 103.22                   | 6.62                     | 15.6     | 17.32              | 0.34        | 5.94     |
| Gemcitabine | 0.93                     | 0.35                     | 2.7      | 0.12               | 0.04        | 1.36     |
| Lobaplatin  | 0.39                     | 0.11                     | 3.7      | 0.10               | 0.001       | 2.26     |
| COLO 205    |                          |                          |          |                    |             |          |
| Mitomycin   | 0.45                     | 0.31                     | 1.4      | 0.14               | 0.05        | 1.18     |
| Abraxane    | 2.51                     | 1.76                     | 1.4      | 1.33               | 0.64        | 1.33     |
| 5-Fu        | 1.41                     | 1.34                     | 1.1      | 0.59               | 0.52        | 0.80     |
| Oxaliplatin | 0.33                     | 0.48                     | 0.7      | 0.09               | 0.09        | 2.57     |
| Raltitrexed | 128.52                   | 8.93                     | 14.4     | 60.83              | 2.59        | 5.12     |
| Gemcitabine | 2.74                     | 1.52                     | 1.8      | 1.03               | 0.28        | 1.53     |
| Lobaplatin  | 4.67                     | 0.96                     | 4.8      | 2.19               | 0.24        | 2.27     |
| SW620       |                          |                          |          |                    |             |          |
| Mitomycin   | 0.07                     | 0.07                     | 1.0      | 0.01               | 0.01        | 0.62     |
| Abraxane    | 0.81                     | 0.94                     | 0.9      | 0.20               | 0.12        | 0.39     |
| 5-Fu        | 0.28                     | 0.15                     | 1.8      | 0.04               | 0.02        | 1.16     |
| Oxaliplatin | 0.13                     | 0.17                     | 0.8      | 0.02               | 0.02        | 1.41     |
| Raltitrexed | 125.20                   | 19.46                    | 6.4      | 70.71              | 4.02        | 2.53     |
| Gemcitabine | 0.56                     | 0.68                     | 0.8      | 0.13               | 0.11        | 0.63     |
| Lobaplatin  | 0.23                     | 0.79                     | 0.3      | 0.07               | 0.17        | 0.10     |

Table S2 Continued

| Drug        | Average                  |                          |        | Standard deviation |       |        |
|-------------|--------------------------|--------------------------|--------|--------------------|-------|--------|
|             | IC <sub>50</sub> (37 °C) | IC <sub>50</sub> (43 °C) | HC SER | 37 °C              | 43 °C | HC SER |
| SW480       |                          |                          |        |                    |       |        |
| Mitomycin   | 0.15                     | 0.06                     | 2.5    | 0.02               | 0.004 | 0.14   |
| Abraxane    | 1.77                     | 1.38                     | 1.3    | 0.40               | 0.82  | 0.27   |
| 5-Fu        | 0.23                     | 0.25                     | 0.9    | 0.04               | 0.03  | 0.47   |
| Oxaliplatin | 0.28                     | 0.35                     | 0.8    | 0.06               | 0.02  | 0.63   |
| Raltitrexed | 11.23                    | 3.39                     | 3.3    | 5.64               | 0.97  | 2.43   |
| Gemcitabine | 1.07                     | 0.51                     | 2.1    | 0.36               | 0.11  | 1.22   |
| Lobaplatin  | 0.39                     | 0.07                     | 5.6    | 0.10               | 0.002 | 3.71   |
